# Supplementary material
Source: Research Square preprint supplement (doi:10.21203/rs.3.rs-9138699/v1)
Supplement: Supplementary file 1 [file 0c5af26cedde32d81e68f769.doc]

**Supplementary materials**

FIGURE:


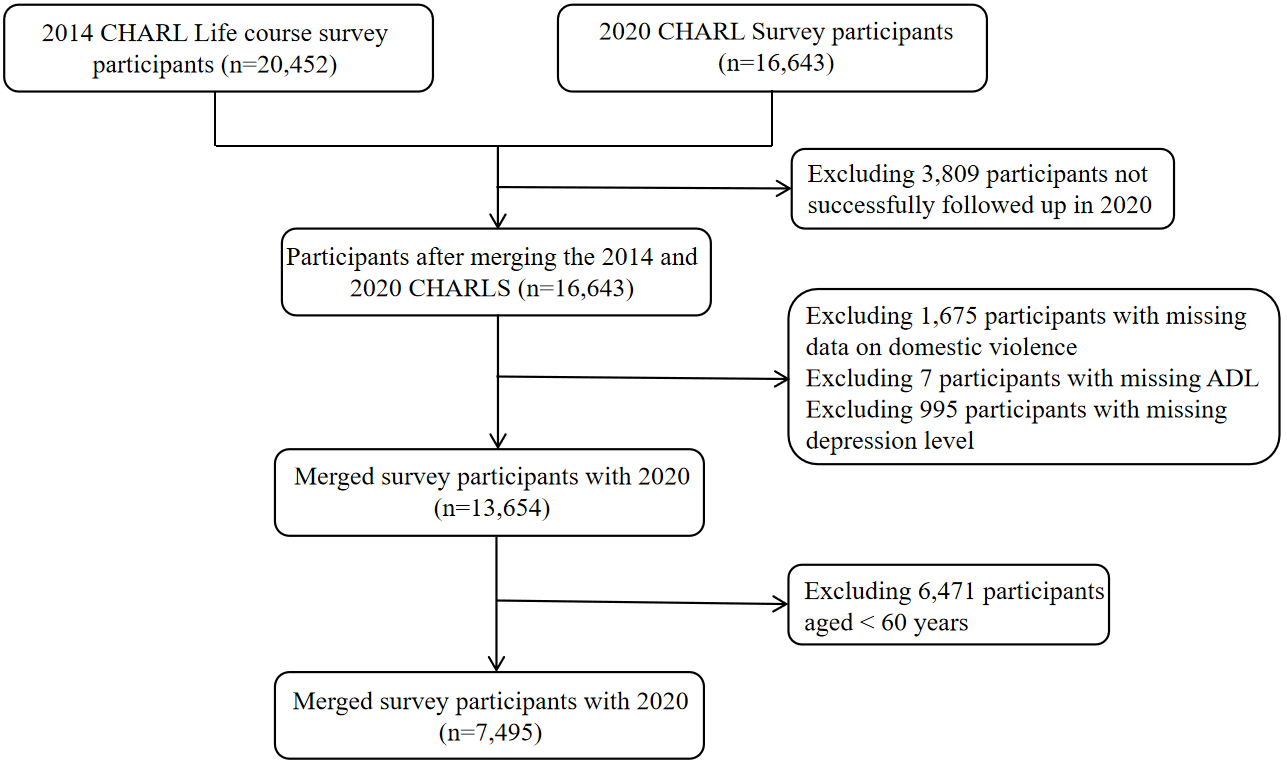


Supplementary Fig 1 Data screening flowchart

TABLE:

Supplementary Table 1 Comparison of general characteristics of participants between the exposed and non-exposed groups before and after PSM, n (%).

| Variables | | Before PSM | | | After PSM | | |
| --- | --- | --- | --- | --- | --- | --- | --- |
| Exposed group（n=2,288） | Non-exposed group (n=5,207) | *c*2 | Exposed group  (n=2,288) | Non-exposed group  (n=2,288) | *c*2 |
| Gender | 1 = Male | 1,280 (55.94) | 2,302 (44.21) | 87.720*** | 1,280 (55.94) | 1,271 (55.94) | 0.072 |
| 2 = Female | 1,008 (44.06) | 2,905 (55.79) | 1,008 (44.06) | 1,017 (44.06) |
| Age  (years) | 1 = 60~64 | 788 (34.44) | 1,700 (32.65) | 10.829* | 788 (34.44) | 800 (34.44) | 0.242 |
| 2 = 65~69 | 739 (32.30) | 1,604 (30.80) | 739 (32.30) | 738 (32.30) |
| 3 = 70~74 | 421 (18.40) | 977 (18.76) | 421 (18.40) | 420 (18.40) |
| 4 = ≥75 | 340 (14.86) | 926 (17.79) | 340 (14.86) | 330 (14.86) |
| Education | 1 = No formal education | 1,156 (50.53) | 2,776 (53.31) | 13.054** | 1,156 (50.53) | 1,154 (50.53) | 0.166 |
| 2 = Primary school | 497 (21.72) | 1,138 (21.86) | 497 (21.72) | 492 (21.72) |
| 3 = Middle school | 419 (18.31) | 784 (15.06) | 419 (18.31) | 429 (18.31) |
| 4 = High school or above | 216 (9.44) | 509 (9.77) | 216 (9.44) | 213 (9.44) |
| Marriage | 1 = With spouse | 1,836 (80.24) | 4,054 (77.86) | 5.386* | 1,836 (80.25) | 1,866 (80.25) | 1.273 |
| 2 = Without spouse | 452 (19.76) | 1,153 (22.14) | 452 (19.75) | 422 (19.75) |
| Chronic diseases | 1 = Yes | 2,005 (87.63) | 4,472 (85.88) | 4.132* | 2,005 (87.63) | 1,980 (87.63) | 1.214 |
| 2 = No | 283 (12.37) | 735 (14.12) | 283 (12.37) | 308 (12.37) |
| Social participation | 1 = Yes | 1,063 (46.46) | 2,360 (45.32) | 0.827 | 1,063 (46.46) | 1,054 (46.46) | 0.071 |
| 2 = No | 1,225 (53.54) | 2,847 (54.68) | 1,225 (53.54) | 1,234 (53.54) |
| Smoking | 1 = Yes | 1,159 (50.66) | 2,180 (41.87) | 49.704*** | 1,159 (50.66) | 1,169 (50.66) | 0.087 |
| 2 = No | 1,129 (49.34) | 3,027 (58.13) | 1,129 (49.34) | 1,119 (49.34) |
| Drinking | 1 = Yes | 865 (37.81) | 1,616 (31.04) | 32.907*** | 865 (37.81) | 869 (37.81) | 0.015 |
| 2 = No | 1,423 (62.19) | 3,591 (68.96) | 1,423 (62.19) | 1,419 (62.19) |

* *P* < 0.05, ** *P* < 0.01, *** *P* < 0.00

Supplementary Table 2 Mediation effect analysis (Depression is a binary variable)

| Variables | Model 1: Pain | | | Model 2: ADL | | | Model 3: Depression level | | |
| --- | --- | --- | --- | --- | --- | --- | --- | --- | --- |
| *β* | *S.E.* | *t* | *β* | *S.E.* | *t* | *β* | *S.E.* | *Z* |
| CDPV | 0.258 | 0.104 | 2.487* | -0.327 | 0.114 | -2.874** | 0.207 | 0.065 | 3.211** |
| Pain |  |  |  | -0.264 | 0.016 | -16.278*** | 0.123 | 0.010 | 12.491*** |
| ADL |  |  |  |  |  |  | -0.105 | 0.010 | -10.659*** |
| Gender | 1.537 | 0.166 | 9.251*** | -0.465 | 0.184 | -2.531* | 0.297 | 0.104 | 2.869** |
| Age | 0.035 | 0.052 | 0.676 | -0.528 | 0.027 | -9.300*** | -0.067 | 0.033 | -2.063* |
| Education | -0.447 | 0.054 | -8.263*** | 0.270 | 0.060 | 4.524*** | -0.172 | 0.034 | -5.015*** |
| Marriage | 0.111 | 0.140 | 0.794 | 0.019 | 0.153 | 0.122 | 0.256 | 0.086 | 2.975** |
| Chronic diseases | -1.905 | 0.156 | -12.192*** | 0.737 | 0.174 | 4.234*** | -0.273 | 0.102 | -2.669** |
| Social participation | -0.075 | 0.106 | -0.709 | -0.706 | 0.116 | -6.083*** | 0.099 | 0.066 | 1.502 |
| Smoking | -0.157 | 0.156 | -1.009 | 0.475 | 0.171 | 2.786** | -0.007 | 0.098 | -0.074 |
| Drinking | 0.163 | 0.117 | 1.392 | 0-.396 | 0.129 | -3.076** | 0.097 | 0.073 | 1.332 |
| *R2* | 0.108 | | | 0.129 | | | 680.558*** | | |
| *F* （*ModelLL*） | 61.457*** | | | 110.463*** | | | — | | |

Note: ModelLL refers to the log-likelihood value. The larger the value, the better the data fit the given model. Since the dependent variable in Model 3 is binary, this metric is used for evaluation.* *P* < 0.05, ** *P* < 0.01, *** *P* < 0.001.

Supplementary Table 3 Mediation effect test (Depression is a binary variable)

| Effect | Path | *β* | *SE* | 95%*CI* | Proportion（%） |
| --- | --- | --- | --- | --- | --- |
| Direct effect | CDPV→Depression level | 0.207 | 0.065 | (0.081, 0.334) | 73.93 |
| Indirect effect | CDPV→Pain→Depression level | 0.032 | 0.013 | (0.006, 0.058) | 11.43 |
| CDPV→ADL→Depression level | 0.034 | 0.013 | (0.011, 0.060) | 12.14 |
| CDPV→Pain→ADL→Depression level | 0.007 | 0.003 | (0.001, 0.014) | 2.5 |

Supplementary Table 4 Mediation effect analysis (Before PSM)

| Variables | Model 1: Pain | | | Model 2: ADL | | | Model 2: Depression level | | |
| --- | --- | --- | --- | --- | --- | --- | --- | --- | --- |
| *β* | *S.E.* | *t* | *β* | *S.E.* | *t* | *β* | *S.E.* | *t* |
| CDPV | 0.667 | 0.086 | 7.787*** | -0.205 | 0.099 | -2.079* | 0.516 | 0.145 | 3.553*** |
| Pain |  |  |  | -0.294 | 0.013 | -22.149*** | 0.438 | 0.020 | 21.730*** |
| ADL |  |  |  |  |  |  | -0.346 | 0.017 | -20.361*** |
| Gender | 1.400 | 0.125 | 11.242*** | -0.313 | 0.144 | -2.171* | 0.851 | 0.212 | 4.012*** |
| Age | 0.010 | 0.038 | 0.267 | -0.543 | 0.044 | -12.390*** | -0.276 | 0.065 | -4.231*** |
| Education | -0.320 | 0.041 | -7.821*** | 0.274 | 0.047 | 5.801*** | -0.739 | 0.070 | -10.612*** |
| Marriage | 0.069 | 0.102 | 0.678 | 0.009 | 0.116 | 0.076 | 1.008 | 0.171 | 5.884*** |
| Chronic diseases | -1.884 | 0.115 | -16.374*** | 0.791 | 0.134 | 5.882*** | -1.139 | 0.198 | -5.748*** |
| Social participation | -0.075 | 0.080 | -0.938 | -0.717 | 0.091 | -7.848*** | 0.293 | 0.135 | 2.172* |
| Smoking | -0.229 | 0.117 | -1.952 | 0.403 | 0.135 | 2.991** | -0.112 | 0.198 | -0.562 |
| Drinking | 0.130 | 0.092 | 1.420 | -0.491 | 0.105 | -4.660*** | 0.533 | 0.155 | 3.429*** |
| *R2* | 0.094 | | | 0.129 | | | 0.218 | | |
| *F* | 86.438*** | | | 110.463*** | | | 189.088*** | | |

* *P* < 0.05, ** *P* < 0.01, *** *P* < 0.001.

Supplementary Table 5 Mediation effect test (Before PSM)

| Effect | Path | *β* | *SE* | 95%*CI* | Proportion（%） |
| --- | --- | --- | --- | --- | --- |
| Total effect | CDPV→Depression level | 0.516 | 0.145 | (0.232, 0.801) | 54.49 |
| Direct effect | CDPV→Pain→Depression level | 0.292 | 0.041 | (0.213, 0.372) | 30.83 |
| CDPV→ADL→Depression level | 0.071 | 0.035 | (0.004, 0.140) | 7.50 |
| CDPV→Pain→ADL→Depression level | 0.068 | 0.010 | (0.049, 0.089) | 7.18 |
